# Supplementary material for: Cu2−xSe@mSiO2–PEG core–shell nanoparticles: a low-toxic and efficient difunctional nanoplatform for chemo-photothermal therapy under near infrared light radiation with a safe power density
Source: Royal Society of Chemistry journal article supplement (doi:10.1039/c3nr06160d), 2014-01-01
Supplement: c3nr06160d1.pdf [file c3nr06160d1.pdf]

## Electronic Supplementary Information

# **Cu<sub>2-x</sub>Se@mSiO<sub>2</sub>-PEG Core-Shell Nanoparticles: a Low-Toxic and Efficient Difunctional Nanoplatfrom for Chemo-Photothermal Therapy under Near Infrared Light Radiation with a Safe Power Density**

**Xijian Liu,<sup>‡ab</sup> Qian Wang,<sup>‡ac</sup> Chun Li,<sup>a</sup> Rujia Zou,<sup>ad</sup> Bo Li,<sup>a</sup> Guosheng Song,<sup>a</sup> Kaibing Xu,<sup>a</sup> Yun Zheng<sup>e</sup> and Junqing Hu<sup>\*a</sup>**

<sup>a</sup> State Key Laboratory for Modification of Chemical Fibers and Polymer Materials, College of Materials Science and Engineering, Donghua University, Shanghai, China. E-mail: hu.junqing@dhu.edu.cn

<sup>b</sup> College of Chemistry and Chemical Engineering, Shanghai University of Engineering Science, Shanghai, China.

<sup>c</sup> Department of Orthopaedics, Shanghai First People's Hospital, Shanghai Jiaotong University, 100 Haining Road, Hongkou District, Shanghai, China..

<sup>d</sup> Center of Super-Diamond and Advanced Films (COSDAF), Department of Physics and Materials Science, City University of Hong Kong, Hong Kong

<sup>e</sup> College of Chemistry, Chemical Engineering and Biotechnology, Donghua University, Shanghai, China.

E-mail: hu.junqing@dhu.edu.cn

## **Supplementary Experimental Section**

Gold nanorods were synthesized by previously described method.<sup>1</sup> Typically, an aqueous Au nanoparticle seed solution was prepared by adding HAuCl<sub>4</sub> solution to CTAB solution. After ice-cold NaBH<sub>4</sub> solution was injected into above mixture solution, the seed solution was acquired and kept at room temperature for at least 2 h before use. The rod growth solution was prepared as followed: The CTAB, HAuCl<sub>4</sub>, AgNO<sub>3</sub> solution was mixed, hydrochloric acid was added to adjust the pH to 1-2, and followed addition of ascorbic acid. Finally, nanorod growth was initiated by injecting seed solution into the growth solution, gently mixing for 10 seconds, and then storing at room temperature for at least 6 h. The Au nanorods were collected by centrifuging and then dispersed in deionized water.

## **Supplementary Figures**

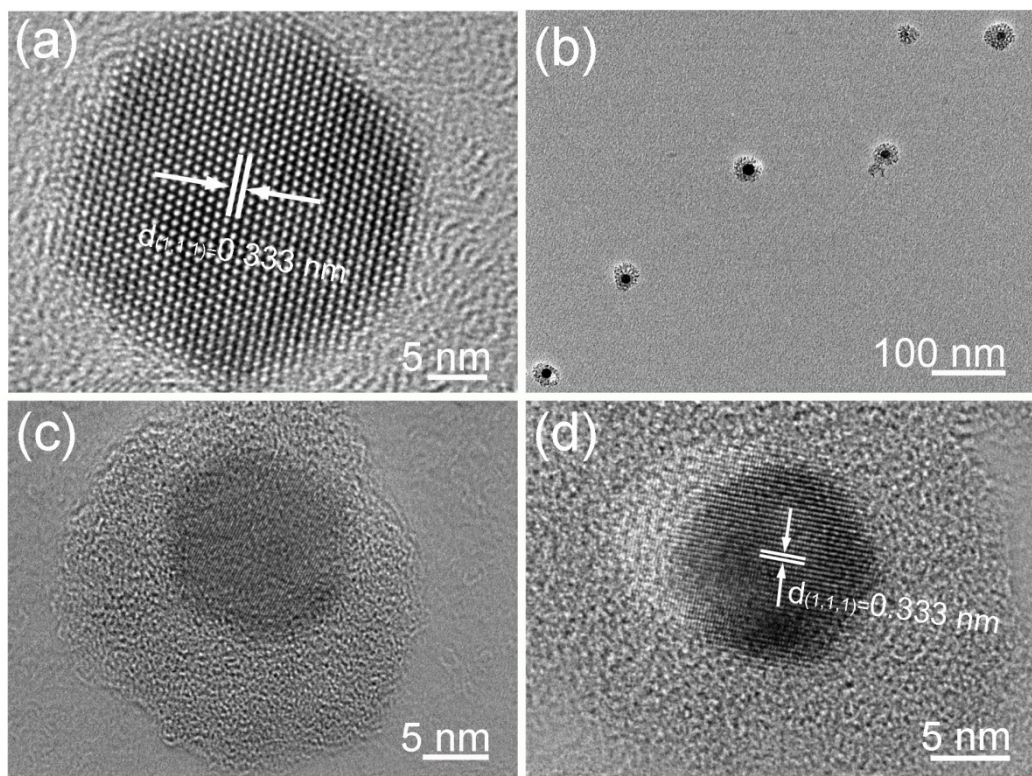

**Fig. S1.** (a) HRTEM images of as-prepared  $\text{Cu}_{2-x}\text{Se}$  nanocrystals, (b) low-magnification TEM images, (c) high magnification TEM and (d) HRTEM images of as-prepared  $\text{Cu}_{2-x}\text{Se}@ \text{SiO}_2\text{-PEG}$  nanoparticles.

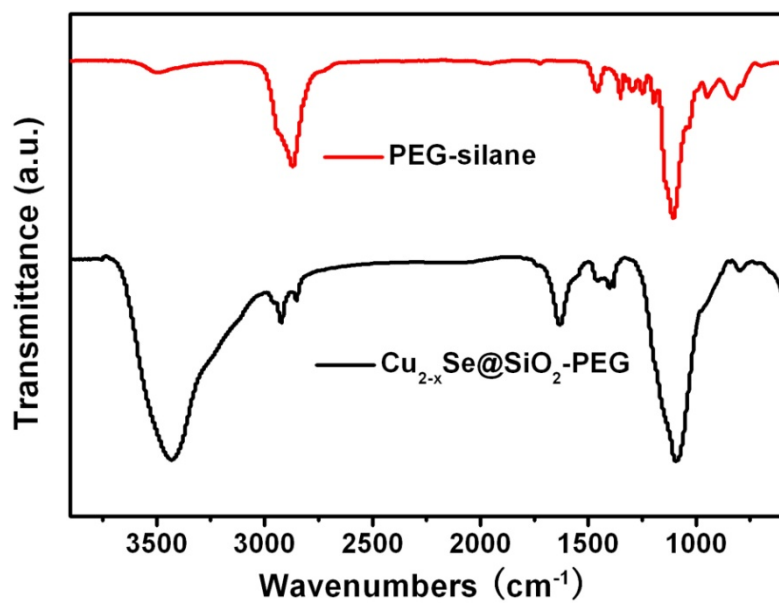

**Fig. S2.** The FTIR spectra of the PEG-silane and as-prepared  $\text{Cu}_{2-x}\text{Se}@ \text{SiO}_2\text{-PEG}$  nanoparticles.

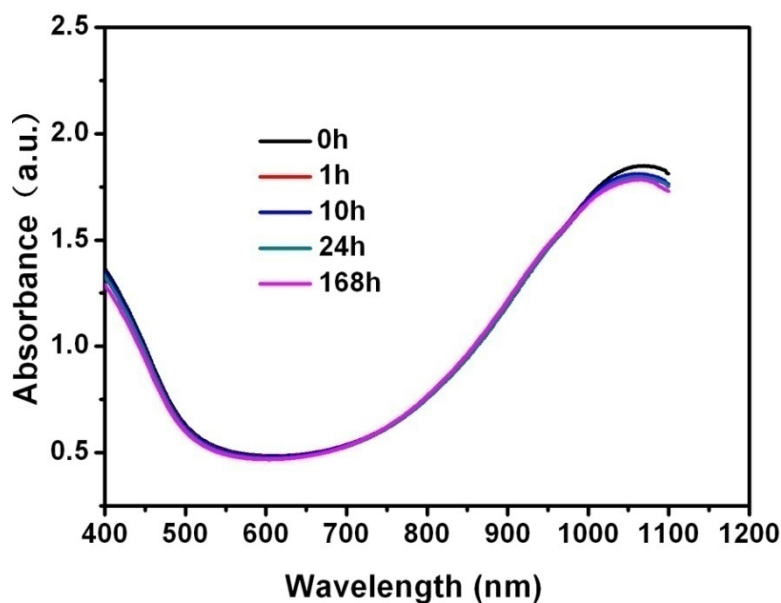

**Fig. S3.** Absorption spectra of the  $\text{Cu}_{2-x}\text{Se}@/\text{SiO}_2\text{-PEG}$  nanoparticles' aqueous solution taken after 0 h, 1 h, 10 h, 24 h and 168 h at room temperature.

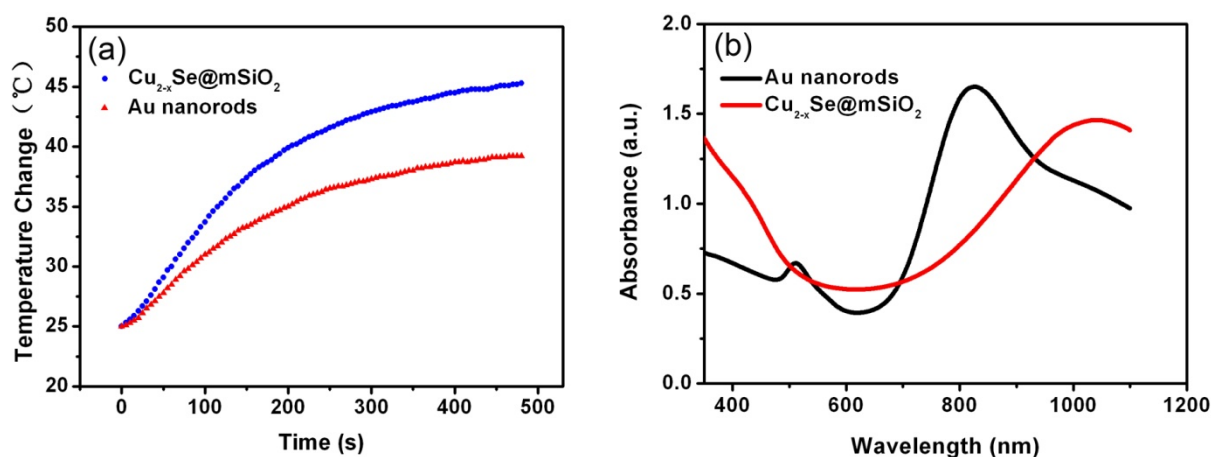

**Fig S4.** (a) Temperature change of the  $\text{Cu}_{2-x}\text{Se}@/\text{mSiO}_2\text{-PEG}$  nanoparticles aqueous solution (48.9 ppm  $\text{Cu}^+$ ) and Au nanorods aqueous solution (50 ppm Au) under irradiation of 980 nm laser at a safe power density ( $0.72 \text{ W/cm}^2$ ). (b) the  $\text{Cu}_{2-x}\text{Se}@/\text{mSiO}_2\text{-PEG}$  nanoparticles aqueous solution (48.9 ppm  $\text{Cu}^+$ ) and Au nanorods aqueous solution (50 ppm Au).

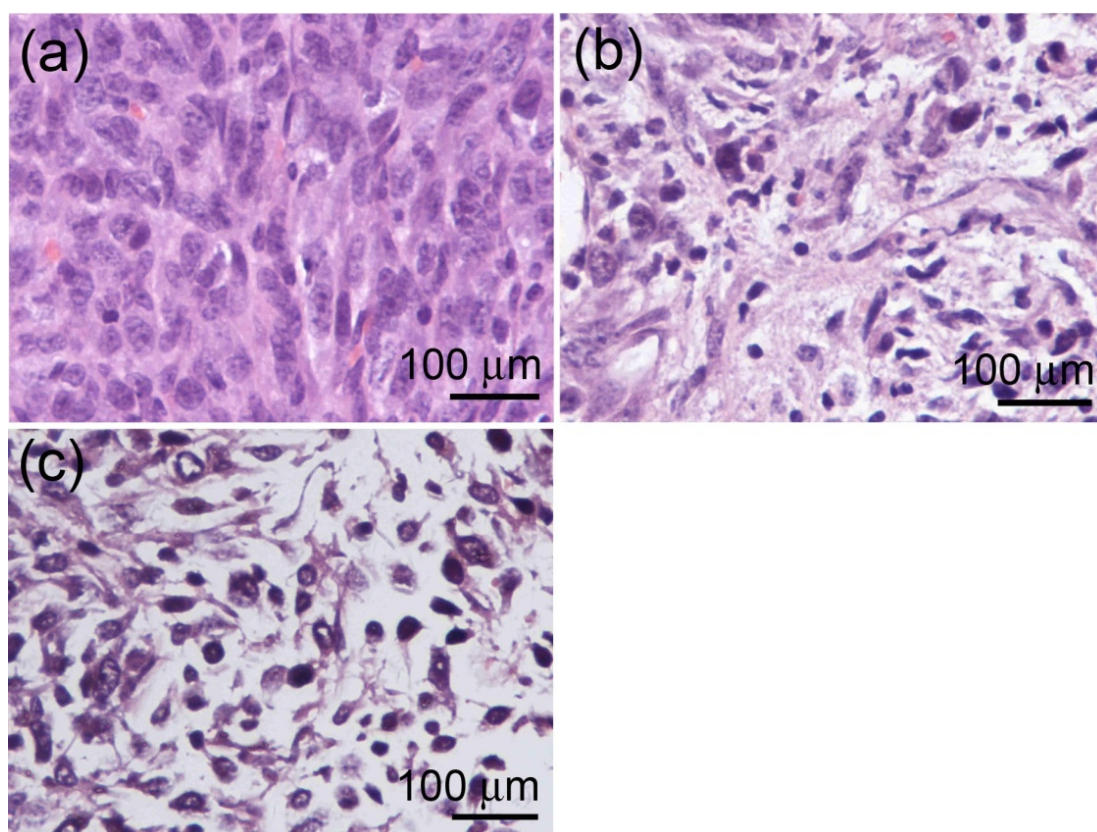

**Fig. S5** High-magnification H&E-stained histological images of (a) injected saline solution, (b) injected  $\text{Cu}_{2-x}\text{Se@mSiO}_2\text{-PEG}$  solution, and (c) injected  $\text{Cu}_{2-x}\text{Se@mSiO}_2\text{-PEG/DOX}$  solution groups of mice after 5 min laser irradiation.

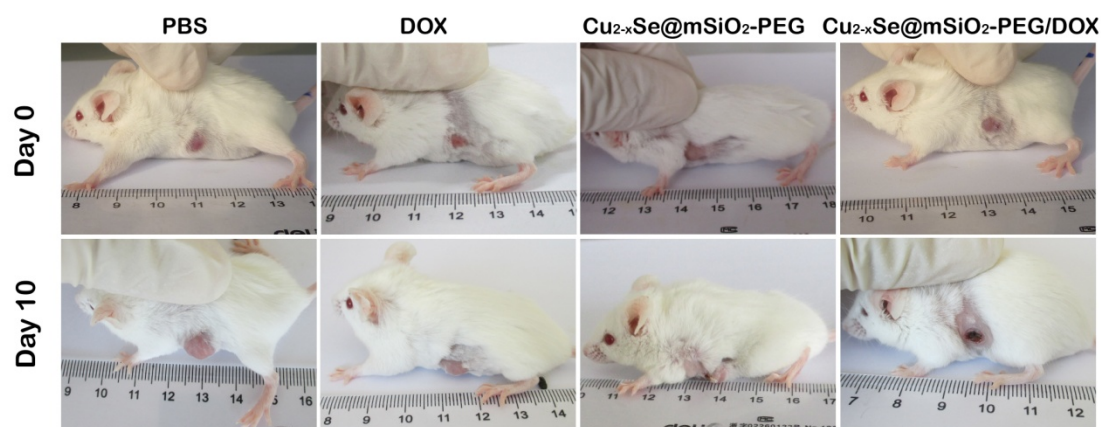

**Fig. S6** Representative photos of mice bearing osteosarcoma tumors before and after PBS, DOX,  $\text{Cu}_{2-x}\text{Se@mSiO}_2\text{-PEG}$  and  $\text{Cu}_{2-x}\text{Se@mSiO}_2\text{-PEG/DOX}$  treatments.

## References

1. Q. Tian, F. Jiang, R. Zou, Q. Liu, Z. Chen, M. Zhu, S. Yang, J. Wang, J. Wang and J. Hu, *Acs Nano*, 2011, **5**, 9761-9771.
